# Supplementary material for: Deep Whole Genome Sequencing Identifies Recurrent Genomic Alterations in Commonly-Used Breast Cancer Cell Lines and Patient Derived Xenograft Models
Source: Research Square preprint supplement (doi:10.21203/rs.3.rs-859624/v2), 2021-09-30
Supplement: Supplementary file 1 [file 0a329e4e4e12a14e5a392d75.xlsx]

## Sheet: SuppTableS7
Table S7. Summary of sequencing depth for PDXs
	Bruna et al.		This Study - Illumina X10
Sample	sWGS	WES	WGS
	availability	availability	availability	SeqDepth	matched blood	Validation
HCI001	✔	✔	-	-	-	-
HCI002	✔	✔	✔	111.6x	-	✔
HCI004	✔	✔	✔	111.1x	43.9x	-
HCI005	✔	✔	✔	97.1x	-	✔
HCI006	-	-	-	-	-	-
HCI008	✔	✔	✔	90.8x	-	-
HCI009	✔	✔	-	-	-	-
HCI010	✔	✔	✔	119.5x	36.7x	✔
HCI011	✔	✔	-	-	-	-
HCI012	-	-	✔	117.9x	-	✔

## Sheet: SuppTableS8
Table S8. List of mutations identified and validated in breast cancer PDXs
Tumor	Gene	Transcript ID	Nucleotide (genomic)	Nucleotide (cDNA)	Amino acid (protein)	Mutation type	Coverage	RefCount	MutCount	MutRatio	Heterozygosity
HCI-005	BRCA2	NM_000059	chr13: 32912965_32912968delGAAA	c.4473_4476delGAAA	fs	INDEL	147	11	136	0.93	homozygous
HCI-005	MSH6	NM_001281493	chr2: 48026176G>A	c.148G>A	p.V50I	missense	678	358	320	0.47	heterozygous
HCI-010	BRCA1	NM_007297	chr17: 41256235dupC	c.203dupC	fs	INDEL	173	2	171	0.99	homozygous
HCI-010	BRCA1	NM_007294	chr17 41256279	c.302-1G>T	Splice Site	Splice Site	102	1	101	0.99	homozygous
HCI-010	KMT2D	NM_003482	chr12: 49426412C>G	c.12076C>G	p.Q4026E	missense	204	109	95	0.47	heterozygous
HCI-010	RB1	NM_000321	chr13: 490394010_49039428delATTCCTGGAGGGAACATCT	c.2395_2413delATTCCTGGAGGGAACATCT	fs	INDEL	427	6	421	0.99	homozygous
HCI-010	RNF43	NM_017763	chr17: 56435462A>C	c.1675A>C	p.K559Q	missense	33	0	33	1	homozygous
HCI-010	SETD2	NM_014159	chr3: 47164649C>T	c.1477C>T	p.R493W	missense	147	0	147	1	homozygous
HCI-010	TP53	NM_001276760	chr17: 7578404T>A	c.409T>A	p.C137S	missense	71	0	71	1	homozygous
HCI-012	MSH6	NM_001281494	chr2: 48033791_48033792insTAAC	c.3095+1insTAAC	Splice Site	Splice Site	54	42	12	0.22	heterozygous
HCI-012	PTEN	NM_000314	chr10: 89720828delA	c.979delA	fs	INDEL	116	24	92	0.79	heterozygous
HCI-012	TP53	NM_001276760	chr17: 7576897delC	c.832delC	fs	INDEL	189	6	183	0.97	homozygous
